# Supplementary material for: Two coordination polymers as multi-responsive luminescent sensors for the detection of UO22+, Cr(vi), and the NFT antibiotic
Source: Royal Society of Chemistry journal article supplement (doi:10.1039/d2ce00631f), 2022-01-01
Supplement: d2ce00631f1.pdf [file d2ce00631f1.pdf]

*Electronic Supplementary Information (ESI) for*

## **Two coordination polymers as multi-responsive luminescent sensors for detection of $\text{UO}_2^{2+}$ , Cr(VI), and NFT antibiotic**

Yun-Shan Xue,<sup>a</sup> Dan-Ling Sun,<sup>a</sup> Jun-Qing Lv,<sup>a</sup> Shi-Juan Li,<sup>a</sup> Xuan-Rong Chen,<sup>a</sup> Wei-Wei Cheng,<sup>b</sup> Hong-Xiu Wu,<sup>\*a</sup> Jun Wang<sup>\*a</sup>

<sup>a</sup>*School of Chemistry & Environmental Engineering, Yancheng Teachers University, Yancheng, 224007, China.*

<sup>b</sup>*School of Chemistry and Bioengineering, Nanjing Normal University Taizhou College, Taizhou 225300, China.*

*E-mail: [wjyctu@hotmail.com](mailto:wjyctu@hotmail.com); [sunnywuxh@163.com](mailto:sunnywuxh@163.com).*

### **Table of Contents**

#### **1. Experimental section**

#### **2. Tables**

Table S1. Crystallographic Data collection and Refinement result for compounds **1-2**.

Table S2. Selected bond lengths (Å) and angles (deg) for compounds **1-2**.

Table S3. Standard deviation and detection limit calculation for  $\text{UO}_2^{2+}$ , Cr(VI) and NFT in **1**.

Table S4. Standard deviation and detection limit calculation for  $\text{UO}_2^{2+}$ , Cr(VI) and NFT in **2**.

Table S5. Comparison of various CPs sensors for the detection of Cr(VI) ions.

Table S6. Comparison of various CPs sensors for the detection of  $\text{UO}_2^{2+}$  ion.

Table S7. Comparison of various CPs sensors for the detection of NFT.

#### **3. Figures**

Fig. S1 The simplified network of compound **1**.

Fig. S2 4,5-connected 3D network of compound **2**.

Fig. S3 PXRD pattern of compound **1**: (a) simulated, (b) experimental.

Fig. S4 PXRD pattern of compound **2**: (a) simulated, (b) experimental.

Fig. S5 TGA curves for compounds **1-2**.

Fig. S6 pH-dependent emission spectra of compound **1** (a) and compound **2** (c) in the aqueous solution with pH ranging from 1 to 13; Histogram showed fluorescence emission of compound **1** (b) and compound **2** (d) at different pH values.

Fig. S7 Luminescence intensities of compound **1** (a, c) and **2** (b, d) with different mixed ions solution added  $\text{Cr}_2\text{O}_7^{2-}$  /  $\text{CrO}_4^{2-}$  anions (m1:  $\text{PO}_4^{3-}$  /  $\text{HPO}_4^{2-}$ ; m2:  $\text{CO}_3^{2-}$  /  $\text{HCO}_3^-$ ; m3:  $\text{SO}_4^{2-}$  /  $\text{C}_2\text{O}_4^{2-}$ ; m4:  $\text{SCN}^-$  /  $\text{NO}_3^-$ ; 1 mM).

Fig. S8 Luminescence intensities of compound **1** (a) and **2** (b) with different mixed ions solution added  $\text{UO}_2^{2+}$  ion (m1:  $\text{K}^+$  /  $\text{Ca}^{2+}$  /  $\text{Mg}^{2+}$ ; m2:  $\text{Zn}^{2+}$  /  $\text{Cd}^{2+}$ ; m3:  $\text{Co}^{2+}$  /  $\text{Ni}^{2+}$ ; m4:  $\text{Ag}^+$  /  $\text{Na}^+$ ; m5:  $\text{Cr}^{3+}$  /  $\text{Cu}^{2+}$ ; 1 mM)

Fig. S9 PXRD pattern of compound **1** after immersing into water with different analytes.

Fig. S10 PXRD pattern of compound 2 after immersing into water with different analytes.

Fig. S11 UV-vis spectra of different anions in aqueous solutions, and the excitation and emission spectra of compounds 1-2.

Fig. S12 UV-vis spectra of different metal ions in aqueous solutions, and the excitation and emission spectra of compounds 1-2.

Fig. S13 The HOMO and LUMO energy levels for different antibiotics and ligands.

Fig. S14 Fluorescence decay for compound 1 ( $\lambda_{\text{ex}} = 300 \text{ nm}$ ).

Fig. S15 Fluorescence decay for compound 1 in the presence of  $\text{Cr}_2\text{O}_7^{2-}$ .

Fig. S16 Fluorescence decay for compound 1 in the presence of  $\text{CrO}_4^{2-}$  ( $\lambda_{\text{ex}} = 300 \text{ nm}$ ).

Fig. S17 Fluorescence decay for compound 1 in the presence of  $\text{UO}_2^{2+}$  ( $\lambda_{\text{ex}} = 300 \text{ nm}$ ).

Fig. S18 Fluorescence decay for compound 1 in the presence of NFT ( $\lambda_{\text{ex}} = 300 \text{ nm}$ ).

Fig. S19 Fluorescence decay for compound 2 ( $\lambda_{\text{ex}} = 300 \text{ nm}$ ).

Fig. S20 Fluorescence decay for compound 2 in the presence of  $\text{Cr}_2\text{O}_7^{2-}$  ( $\lambda_{\text{ex}} = 300 \text{ nm}$ ).

Fig. S21 Fluorescence decay for compound 2 in the presence of  $\text{CrO}_4^{2-}$  ( $\lambda_{\text{ex}} = 300 \text{ nm}$ ).

Fig. S22 Fluorescence decay for compound 2 in the presence of  $\text{UO}_2^{2+}$  ( $\lambda_{\text{ex}} = 300 \text{ nm}$ ).

Fig. S23 Fluorescence decay for compound 2 in the presence of NFT ( $\lambda_{\text{ex}} = 300 \text{ nm}$ ).

Scheme S1. The structures of selected antibiotics.

## 1. Experimental section

### X-ray crystallography

Suitable single crystals of the seven compounds were performed on Bruker APEX D8 QUEST diffractometer with a Photon 100 CMOS detector (Mo-K $\alpha$  radiation,  $\lambda = 0.71073 \text{ \AA}$ ). SADABS and SAINT programs were applied for absorption correction and data processing. The structures were solved by direct methods and refined with full-matrix least-squares on  $F^2$  using the SHELXTL-2014 software package.<sup>1</sup> All the non-hydrogen atoms were refined anisotropically. The hydrogen atoms of organic ligands were placed in geometrically calculated positions and refined using the riding model. Details of the crystallographic data are listed in Table S1. Selected bond lengths and angles for compounds **1-2** are provided in Table S2. CCDC numbers: 2143928, 2143929 for compounds 1-2, respectively.

### Calculations

The calculation of the ligand was performed using the Gaussian 09 program. The structure was completely optimized to the ground state by the DFT method at D-B3LYP/6-31G\* level. Then the singlet and triplet energy of structures were calculated based on TD-SCF method.

## 2. Tables

Table S1. Crystallographic Data collection and Refinement result for compounds **1-2**.

| Compound reference                                                            | 1                                                                                              | 2                                                                               |
|-------------------------------------------------------------------------------|------------------------------------------------------------------------------------------------|---------------------------------------------------------------------------------|
| chemical formula                                                              | C <sub>50</sub> H <sub>52</sub> Cd <sub>3</sub> N <sub>16</sub> O <sub>17</sub> S <sub>2</sub> | C <sub>25</sub> H <sub>34</sub> N <sub>8</sub> O <sub>13</sub> SZn <sub>2</sub> |
| Crystal system                                                                | triclinic                                                                                      | monoclinic                                                                      |
| Space group                                                                   | <i>P</i> -1                                                                                    | <i>C</i> 2/ <i>c</i>                                                            |
| <i>a</i> /Å                                                                   | 9.0385(15)                                                                                     | 18.413(2)                                                                       |
| <i>b</i> /Å                                                                   | 10.4711(17)                                                                                    | 17.351(2)                                                                       |
| <i>c</i> /Å                                                                   | 16.391(3)                                                                                      | 20.090(3)                                                                       |
| $\alpha$ /°                                                                   | 79.025(5)                                                                                      | 90                                                                              |
| $\beta$ /°                                                                    | 82.828(5)                                                                                      | 94.808(4)                                                                       |
| $\gamma$ /°                                                                   | 66.964(4)                                                                                      | 90                                                                              |
| Unit cell volume / Å <sup>3</sup>                                             | 1399.3(4)                                                                                      | 6395.6(13)                                                                      |
| Temperature / K                                                               | 298                                                                                            | 298                                                                             |
| <i>Z</i>                                                                      | 1                                                                                              | 8                                                                               |
| $\mu$ (mm <sup>-1</sup> )                                                     | 1.292                                                                                          | 1.644                                                                           |
| No. of reflections measured                                                   | 9690                                                                                           | 9440                                                                            |
| No. of independent reflections                                                | 6390                                                                                           | 7374                                                                            |
| <i>R</i> <sub>int</sub>                                                       | 0.0556                                                                                         | 0.0237                                                                          |
| Final <i>R</i> <sub><i>I</i></sub> values ( <i>I</i> > 2σ( <i>I</i> ))        | 0.0371                                                                                         | 0.0279                                                                          |
| Final <i>wR</i> ( <i>F</i> <sup>2</sup> ) values ( <i>I</i> > 2σ( <i>I</i> )) | 0.0891                                                                                         | 0.0732                                                                          |
| Final <i>R</i> <sub>1</sub> <sup>a</sup> values (all data)                    | 0.0429                                                                                         | 0.0303                                                                          |
| Final <i>wR</i> ( <i>F</i> <sup>2</sup> ) <sup>b</sup> values (all data)      | 0.0937                                                                                         | 0.0751                                                                          |
| Goodness of fit on <i>F</i> <sup>2</sup>                                      | 1.094                                                                                          | 1.080                                                                           |

$${}^a R_1 = \sum ||F_o| - |F_c|| / \sum |F_o|. \quad {}^b wR_2 = \sum [w(F_o^2 - F_c^2)^2] / \sum [w(F_o^2)^2]^{1/2}.$$

Table S2. Selected bond lengths (Å) and angles (deg) for compounds **1-2**.

| Compound 1                             |            |                                         |            |                                        |            |                                        |            |
|----------------------------------------|------------|-----------------------------------------|------------|----------------------------------------|------------|----------------------------------------|------------|
| Cd1 O6                                 | 2.377(3)   | Cd1 N1 <sup>ii</sup>                    | 2.312(3)   | Cd1 N6 <sup>i</sup>                    | 2.307(3)   | Cd2 O1 <sup>iv</sup>                   | 2.392(3)   |
| Cd2 O4                                 | 2.266(2)   | Cd2 O5 <sup>v</sup>                     | 2.299(3)   | Cd2 O8 <sup>iv</sup>                   | 2.429(3)   | Cd2 N3                                 | 2.301(4)   |
| Cd2 N8 <sup>v</sup>                    | 2.302(3)   |                                         |            |                                        |            |                                        |            |
| N1 <sup>iii</sup> Cd1 O6 <sup>i</sup>  | 91.22(10)  | N6 <sup>i</sup> Cd1 O6 <sup>i</sup>     | 86.43(11)  | N8 <sup>v</sup> Cd2 O1 <sup>iv</sup>   | 92.79(11)  | O1 <sup>iv</sup> Cd2 O8 <sup>iv</sup>  | 54.26(8)   |
| N1 <sup>ii</sup> Cd1 O6 <sup>i</sup>   | 88.78(10)  | N6 Cd1 O6 <sup>i</sup>                  | 93.57(11)  | N8 <sup>v</sup> Cd2 O8 <sup>iv</sup>   | 84.56(10)  | O4 Cd2 O1 <sup>iv</sup>                | 95.25(9)   |
| N1 <sup>ii</sup> Cd1 N1 <sup>iii</sup> | 180.000    | N6 Cd1 O6                               | 86.43(11)  | O5 <sup>v</sup> Cd2 O1 <sup>iv</sup>   | 149.95(10) | O4 Cd2 O5 <sup>v</sup>                 | 113.45(10) |
| N3 Cd2 O1 <sup>iv</sup>                | 90.92(12)  | N6 <sup>i</sup> Cd1 N1 <sup>ii</sup>    | 91.88(10)  | O5 <sup>v</sup> Cd2 O8 <sup>iv</sup>   | 95.73(10)  | O4 Cd2 O8 <sup>iv</sup>                | 147.15(9)  |
| N3 Cd2 O8 <sup>iv</sup>                | 87.18(12)  | N6 <sup>i</sup> Cd1 N1 <sup>iii</sup>   | 88.12(10)  | O5 <sup>v</sup> Cd2 N3                 | 88.96(13)  | O4 Cd2 N3                              | 107.25(12) |
| N3 Cd2 N8 <sup>v</sup>                 | 166.61(13) | N6 <sup>i</sup> Cd1 N6                  | 180.000    | O5 <sup>v</sup> Cd2 N8 <sup>v</sup>    | 81.41(12)  | O4 Cd2 N8 <sup>v</sup>                 | 85.22(10)  |
| O6 <sup>i</sup> Cd1 O6                 | 180.000    |                                         |            |                                        |            |                                        |            |
| Compound 2                             |            |                                         |            |                                        |            |                                        |            |
| Zn1 O1                                 | 1.9210(14) | Zn1 N1 <sup>i</sup>                     | 1.9920(14) | Zn2 O1                                 | 1.9158(13) | Zn2 N3 <sup>iii</sup>                  | 2.0310(17) |
| Zn1 O10                                | 1.9388(13) | Zn1 N4                                  | 2.0167(15) | Zn2 O12 <sup>ii</sup>                  | 2.0328(17) | Zn2 N8 <sup>iv</sup>                   | 2.0102(15) |
| O1 Zn1 O10                             | 100.91(6)  | O1 Zn1 N1 <sup>i</sup>                  | 109.28(6)  | O1 Zn2 N3 <sup>iii</sup>               | 108.43(6)  | O10 Zn1 N1 <sup>i</sup>                | 124.61(6)  |
| O1 Zn2 O12 <sup>ii</sup>               | 106.65(7)  | O1 Zn1 N4                               | 110.92(6)  | O1 Zn2 N8 <sup>iv</sup>                | 103.34(6)  | O10 Zn1 N4                             | 101.37(6)  |
| N1 <sup>i</sup> Zn1 N4                 | 109.13(6)  | N3 <sup>iii</sup> Zn2 O12 <sup>ii</sup> | 97.15(7)   | N8 <sup>iv</sup> Zn2 O12 <sup>ii</sup> | 134.24(7)  | N8 <sup>iv</sup> Zn2 N3 <sup>iii</sup> | 105.21(7)  |

Symmetry codes for **1**: (i) -x, 2-y, 2-z; (ii) 1-x, 1-y, 2-z; (iii) -1+x, 1+y, z; (iv) x, 1+y, z; (v) -x, 1-y, 1-z; (vi) x, -1+y, z; (vii) 1+x, -1+y, z. For **2**: (i) 1.5-x, 0.5-y, 1-z; (ii) 0.5-x, 0.5-y, 1-z; (iii) 1-x, -y, 1-z; (iv) -0.5+x, 0.5-y, -0.5+z; (v) 0.5+x, 0.5-y, 0.5+z.

**Table S3** Standard deviation and detection limit calculation for  $\text{UO}_2^{2+}$ , Cr(VI) and NFT in 1.

|                                      | $\text{UO}_2^{2+}$    | $\text{Cr}_2\text{O}_7^{2-}$ | $\text{CrO}_4^{2-}$   | NFT                   |
|--------------------------------------|-----------------------|------------------------------|-----------------------|-----------------------|
| 1                                    | 479673.92             | 479278.02                    | 479268.75             | 479865.18             |
| 2                                    | 479673.85             | 479278.34                    | 479268.21             | 479865.75             |
| 3                                    | 479673.42             | 479278.92                    | 479269.87             | 479865.52             |
| 4                                    | 479673.27             | 479278.85                    | 479268.93             | 479865.40             |
| 5                                    | 479673.32             | 479278.10                    | 479268.65             | 479865.14             |
| Standard deviation ( $\sigma$ )      | 0.306                 | 0.418                        | 0.613                 | 0.251                 |
| $K_{sv}$                             | $4.69 \times 10^3$    | $1.92 \times 10^4$           | $8.03 \times 10^3$    | $1.34 \times 10^4$    |
| Detection limit ( $3\sigma/K_{sv}$ ) | $1.96 \times 10^{-4}$ | $6.53 \times 10^{-5}$        | $2.29 \times 10^{-4}$ | $5.62 \times 10^{-5}$ |

**Table S4** Standard deviation and detection limit calculation for  $\text{UO}_2^{2+}$ , Cr(VI) and NFT in 2.

|                                      | $\text{UO}_2^{2+}$    | $\text{Cr}_2\text{O}_7^{2-}$ | $\text{CrO}_4^{2-}$   | NFT                   |
|--------------------------------------|-----------------------|------------------------------|-----------------------|-----------------------|
| 1                                    | 536557.86             | 536539.00                    | 536124.29             | 537097.14             |
| 2                                    | 536557.64             | 536539.42                    | 536124.72             | 537097.33             |
| 3                                    | 536557.57             | 536539.22                    | 536124.63             | 537097.27             |
| 4                                    | 536557.25             | 536539.32                    | 536124.71             | 537097.24             |
| 5                                    | 536557.52             | 536539.72                    | 536124.31             | 537097.57             |
| Standard deviation ( $\sigma$ )      | 0.220                 | 0.265                        | 0.215                 | 0.161                 |
| $K_{sv}$                             | $4.86 \times 10^3$    | $1.47 \times 10^4$           | $6.20 \times 10^3$    | $1.02 \times 10^4$    |
| Detection limit ( $3\sigma/K_{sv}$ ) | $1.36 \times 10^{-4}$ | $5.41 \times 10^{-5}$        | $1.04 \times 10^{-4}$ | $4.74 \times 10^{-5}$ |

Table S5. Comparison of various CPs sensors for the detection of Cr(VI) ions.

|   | Analyte                                                                                              | CPs-based fluorescent Materials                                                                              | Quenching constant<br>( $K_{SV} \times 10^4 \text{ M}^{-1}$ ) | Detection Limits<br>(DL) | Ref |
|---|------------------------------------------------------------------------------------------------------|--------------------------------------------------------------------------------------------------------------|---------------------------------------------------------------|--------------------------|-----|
| 1 | $\text{Cr}_2\text{O}_7^{2-}$                                                                         | $[\text{H}_2\text{N}(\text{CH}_3)_2][\text{Zn}_2\text{L}(\text{HPO}_3)_2]$                                   | 39.6                                                          | 0.116 $\mu\text{M}$      | 2   |
| 2 |                                                                                                      | $\{[\text{Zn}_3(\text{HL})_2\text{H}_2\text{O}] \cdot 4\text{H}_2\text{O}\}_n$                               | 50                                                            |                          | 3   |
| 3 |                                                                                                      | $\{[\text{Zn}(\text{H}_2\text{BCA})(\text{m-bib})] \cdot \text{H}_2\text{O}\}_n$                             | 5.3                                                           | 0.07 $\mu\text{M}$       | 4   |
| 4 |                                                                                                      | $\{[\text{Zn}_2(\text{tpcb})_2(2,3\text{-ndc})_2] \cdot \text{H}_2\text{O}\}_n$                              | 7.09                                                          | 2.623 ppb                | 5   |
| 5 |                                                                                                      | $[\text{Cd}(\text{TIPA})_2(\text{ClO}_4)_2]$                                                                 | $7.15 \times 10^4$                                            | 8 ppb                    | 6   |
|   |                                                                                                      | $[\text{Zn}(\text{NH}_2\text{-bdc})(4,4'\text{-bpy})]$                                                       | 7.62                                                          | 1.30 $\mu\text{M}$       | 7   |
| 6 |                                                                                                      | $[\text{Cd}_2(\text{L}_1)(1,4\text{-NDC})_2]_n$                                                              | 5.86                                                          | 0.031 ppm                | 8   |
| 7 |                                                                                                      | $[\text{Zn}_5(\text{TDA})_4(\text{TZ})_4] \cdot 4\text{DMF}\}_n$                                             | 0.677                                                         |                          | 9   |
| 8 | $[\text{Cd}_{1.5}(\text{L})_2(\text{bpy})(\text{NO}_3)] \cdot 2\text{DMF} \cdot 2\text{H}_2\text{O}$ | 5.42                                                                                                         | 320 ppb                                                       | 10                       |     |
|   |                                                                                                      |                                                                                                              |                                                               |                          |     |
| 1 | $\text{CrO}_4^{2-}$                                                                                  | $[\text{Cd}_{1.5}(\text{L})_2(\text{bpy})(\text{NO}_3)] \cdot 2\text{DMF} \cdot 2\text{H}_2\text{O}$         | 1.73                                                          | 280 ppb                  | 10  |
| 2 |                                                                                                      | $[\text{Zn}_2(\text{TPOM})(\text{NDC})_2] \cdot 3.5\text{H}_2\text{O}$                                       | 0.781                                                         | 2.50 $\mu\text{M}$       | 11  |
| 3 |                                                                                                      | $\{[\text{Zn}(\text{L})_{0.5}(\text{bimb})] \cdot 2\text{H}_2\text{O} \cdot 0.5(\text{CH}_3)_2\text{NH}\}_n$ | 5.04                                                          | 0.60 $\mu\text{M}$       | 12  |
| 4 |                                                                                                      | $[\text{Ni}(\text{ppvppa})(5\text{-NO}_2\text{-1,3-BDC})(\text{H}_2\text{O})] \cdot 0.5\text{MeCN}$          | 21.05                                                         | 0.09 ppb                 | 13  |
| 5 |                                                                                                      | $\{[\text{Cd}_2\text{L}_2(\text{H}_2\text{O})_4] \cdot \text{H}_2\text{O}\}_n$                               | 1.21                                                          | 3.8 $\mu\text{M}$        | 14  |
| 6 |                                                                                                      | $\{[\text{Zn}_2\text{L}_2(\text{H}_2\text{O})_4] \cdot \text{H}_2\text{O}\}_n$                               | 1.95                                                          | 2.3 $\mu\text{M}$        |     |

Table S6. Comparison of various CPs sensors for the detection of  $\text{UO}_2^{2+}$  ion.

|   | Analyte            | CPs-based fluorescent Materials                                                                      | Quenching constant<br>( $K_{SV} \times 10^4 \text{ M}^{-1}$ ) | Detection Limits<br>(DL)        | Ref       |
|---|--------------------|------------------------------------------------------------------------------------------------------|---------------------------------------------------------------|---------------------------------|-----------|
| 1 | $\text{UO}_2^{2+}$ | $[\text{Eu}_2(\text{TATAB})_2] \cdot 4\text{H}_2\text{O} \cdot 6\text{DMF}$                          | 8.4                                                           | 0.9 $\mu\text{M}$               | 15        |
| 2 |                    | $[\text{Tb}(\text{BPDC})_2] \cdot (\text{CH}_3)_2\text{NH}_2$ (DUT-101)                              | 1.03                                                          | 8.34 mg/L                       | 16        |
| 3 |                    | Tb-FAP/agar                                                                                          | 24.7                                                          | 7.95 nM                         | 17        |
| 4 |                    | $[\text{Zn}(\text{HL})(\text{bipy})_{0.5}(\text{H}_2\text{O})] \cdot 2\text{H}_2\text{O}$            | 4.0                                                           | 0.4 $\mu\text{M}$               | 18        |
| 5 |                    | $[\text{EuL}_{1.5}(\text{H}_2\text{O})_2] \cdot 1.75\text{H}_2\text{O}$                              | 0.371                                                         |                                 | 19        |
|   |                    | $[\text{Co}_2(\text{dmimpym})(\text{nda})_2]_n$                                                      | 1.1                                                           |                                 | 20        |
| 6 |                    | $(\text{CH}_3)_2\text{NH}_2[\text{Eu}_2(\text{BTC})(\text{AC})_3(\text{FM})]$                        | 0.856                                                         | 4.12 $\mu\text{M}$              | 21        |
| 7 |                    | $[\text{Eu}_2(\text{MTBC})(\text{OH})_2(\text{DMF})_3(\text{H}_2\text{O})_4]$                        | 0.363                                                         | 309.2 $\mu\text{g/L}$           | 22        |
| 8 |                    | $[\text{Zn}(\text{HBTC})(\text{BMIOPE}) \cdot \text{DMF} \cdot \text{H}_2\text{O}]_n$                | 2.29                                                          | $2.47 \times 10^{-5} \text{ M}$ | 23        |
|   |                    | $\{[\text{Cd}_3(\text{TIYM})_2(5\text{-SASS})_2(\text{H}_2\text{O})_2] \cdot \text{H}_2\text{O}\}_n$ | 0.469                                                         | $1.96 \times 10^{-4} \text{ M}$ | This work |
|   |                    | $\{[\text{Zn}_2(\text{TIYM})(5\text{-SASS})(\mu_2\text{-OH})] \cdot 5\text{H}_2\text{O}\}_n$         | 0.486                                                         | $1.36 \times 10^{-4} \text{ M}$ |           |

Table S7. Comparison of various CPs sensors for the detection of NFT.

|   | Analyte | CPs-based fluorescent Materials                                                                    | Quenching constant<br>( $K_{SV} \times 10^4 \text{ M}^{-1}$ ) | Detection Limits<br>(DL) | Ref |
|---|---------|----------------------------------------------------------------------------------------------------|---------------------------------------------------------------|--------------------------|-----|
| 1 | NFT     | $[\text{Zn}(\text{L})_2] \cdot \text{CH}_2\text{Cl}_2 \cdot \text{CH}_3\text{OH}$                  | 1.58                                                          |                          | 18  |
|   |         | $\{[\text{Tb}(\text{TATMA})(\text{H}_2\text{O}) \cdot 2\text{H}_2\text{O}]\}_n$                    | 3.35                                                          |                          | 19  |
|   |         | $[\text{Cd}(\text{tptc})_{0.5}(\text{o-bimb})]_n$                                                  | 3.4                                                           |                          | 20  |
| 2 |         | $[\text{Cd}(\text{H}_2\text{tptc})_{0.5}(\text{mbimb})(\text{Cl})]_n$                              | 26                                                            |                          | 20  |
| 3 |         | $\{[\text{Cd}_3(\text{TDCPB}) \cdot 2\text{DMAc}] \cdot \text{DMAc} \cdot 4\text{H}_2\text{O}\}_n$ | 10.5                                                          |                          | 21  |
|   |         | $[\text{Zn}_2(\text{azdc})_2(\text{dpta})] \cdot (\text{DMF})_4$                                   | 7.14                                                          |                          | 22  |



### 3. Figures

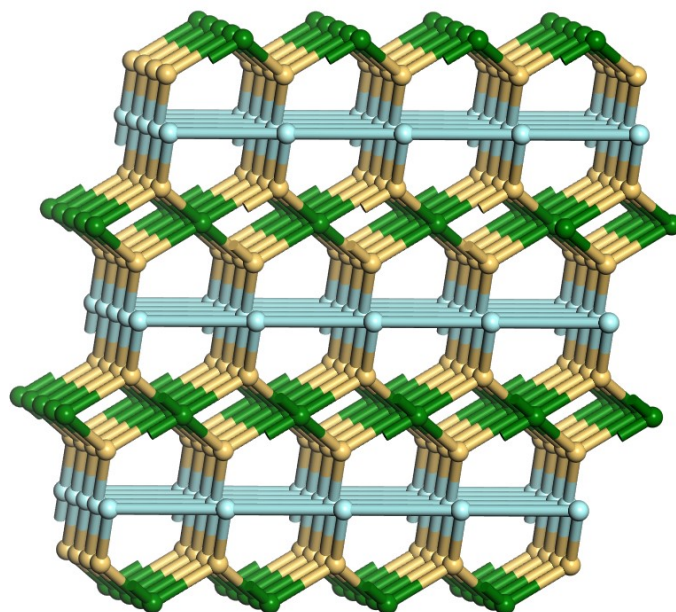

Fig. S1 The simplified network of compound 1.

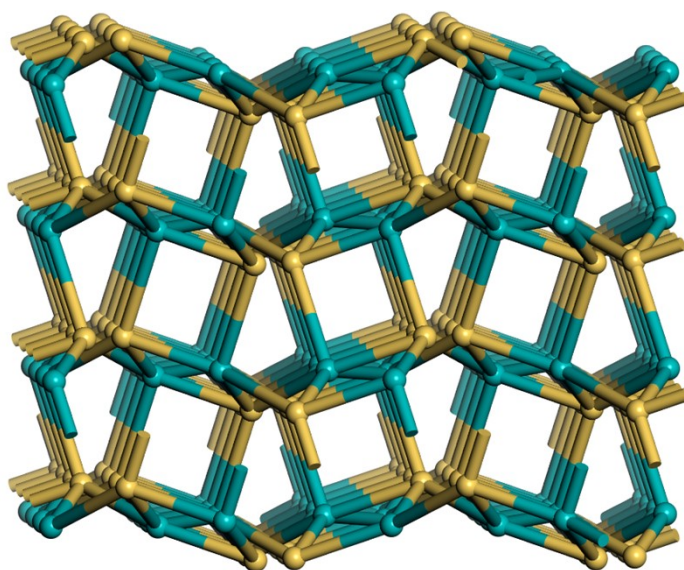

Fig. S2 4,5-connected 3D network of compound 2.

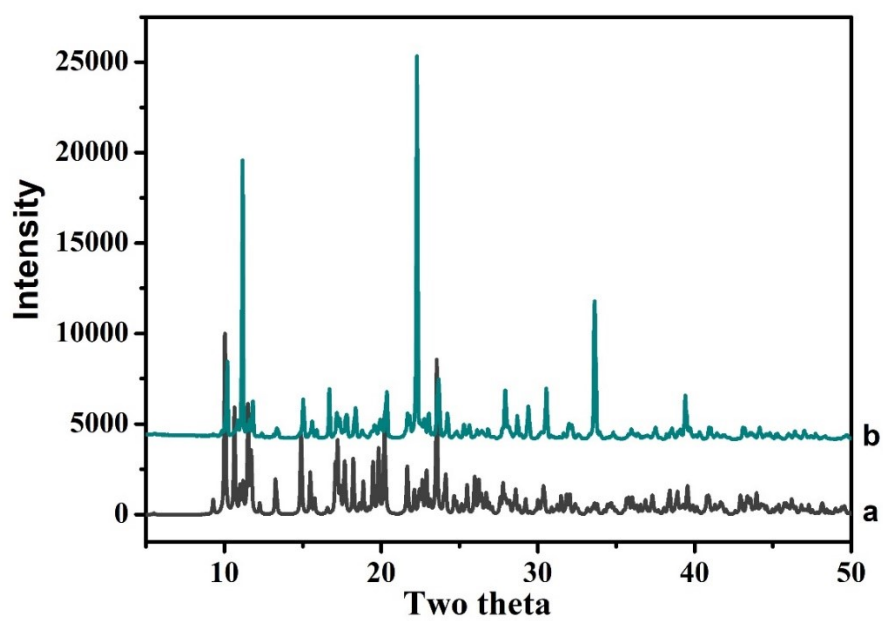

Fig. S3 PXRd pattern of compound 1: (a) simulated, (b) experimental.

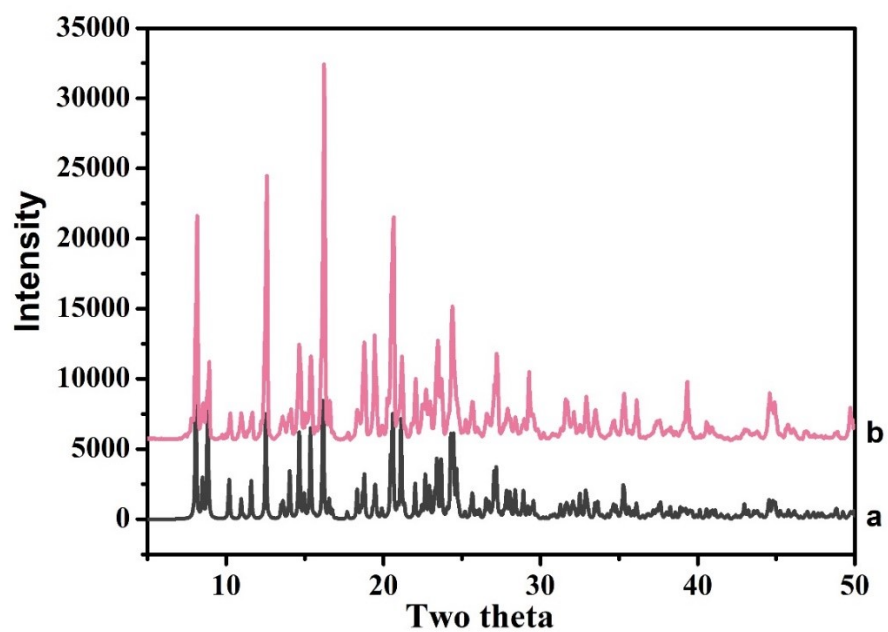

Fig. S4 PXRd pattern of compound 2: (a) simulated, (b) experimental.

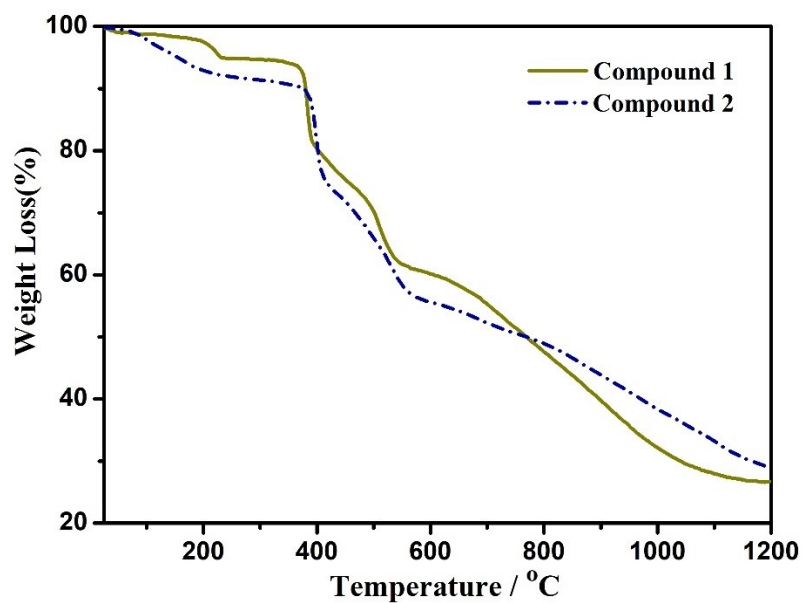

Fig. S5 TGA curves for compounds 1-2.

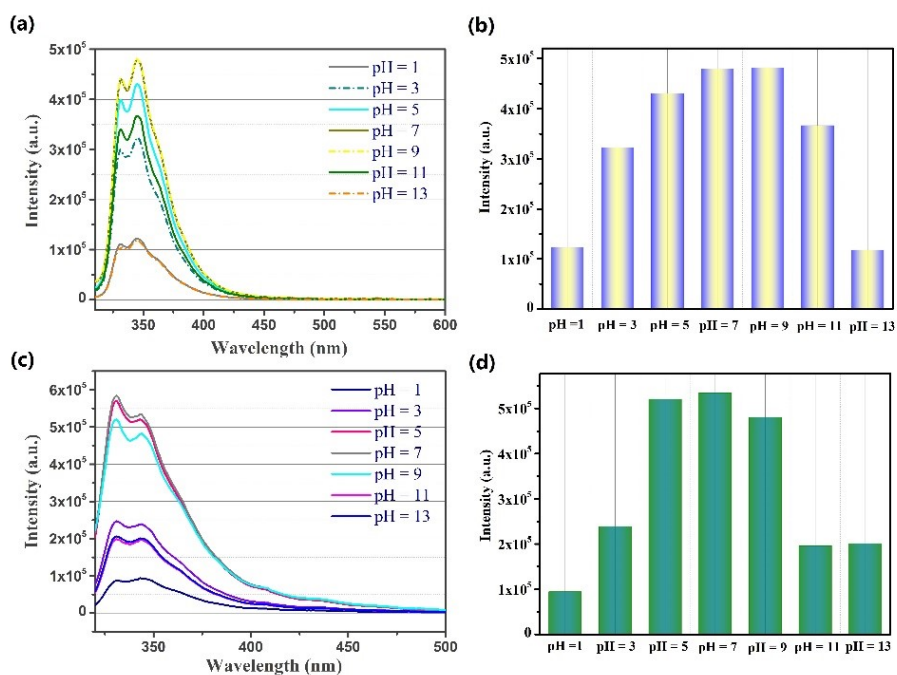

Fig. S6 pH-dependent emission spectra of compound 1 (a) and compound 2 (c) in the aqueous solution with pH ranging from 1 to 13; Histogram showed fluorescence emission of compound 1 (b) and compound 2 (d) at different pH values.

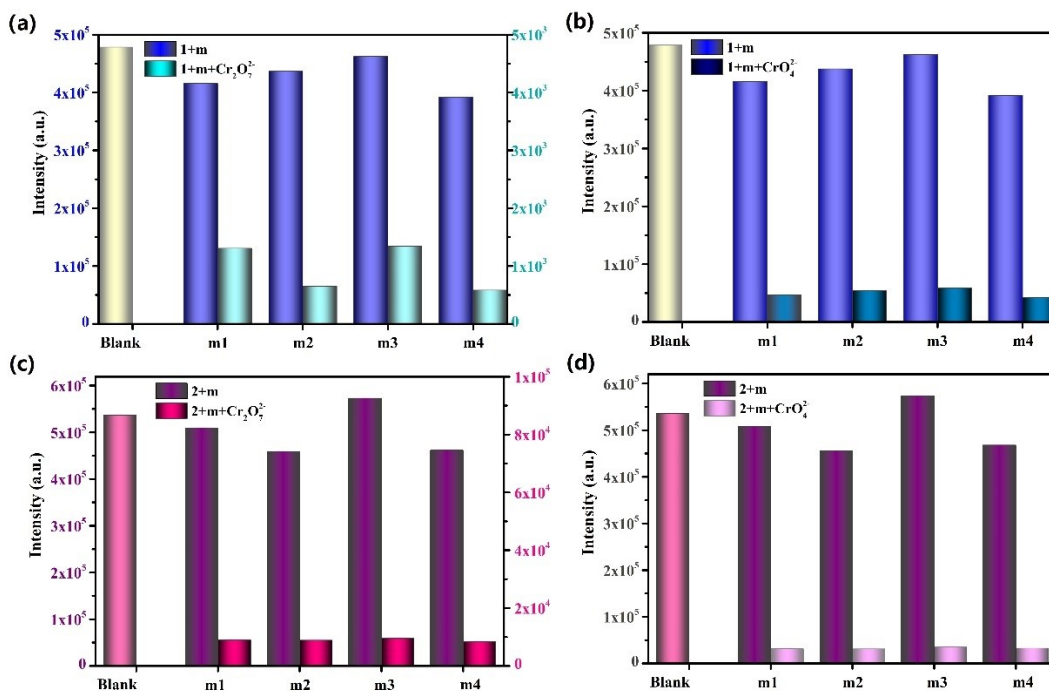

Fig. S7 Luminescence intensities of compound 1 (a, c) and 2 (b, d) with different mixed ions solution added  $\text{Cr}_2\text{O}_7^{2-}$  /  $\text{CrO}_4^{2-}$  anions (m1:  $\text{PO}_4^{3-}$  /  $\text{HPO}_4^{2-}$ ; m2:  $\text{CO}_3^{2-}$  /  $\text{HCO}_3^-$ ; m3:  $\text{SO}_4^{2-}$  /  $\text{C}_2\text{O}_4^{2-}$ ; m4:  $\text{SCN}^-$  /  $\text{NO}_3^-$ ; 1 mM).

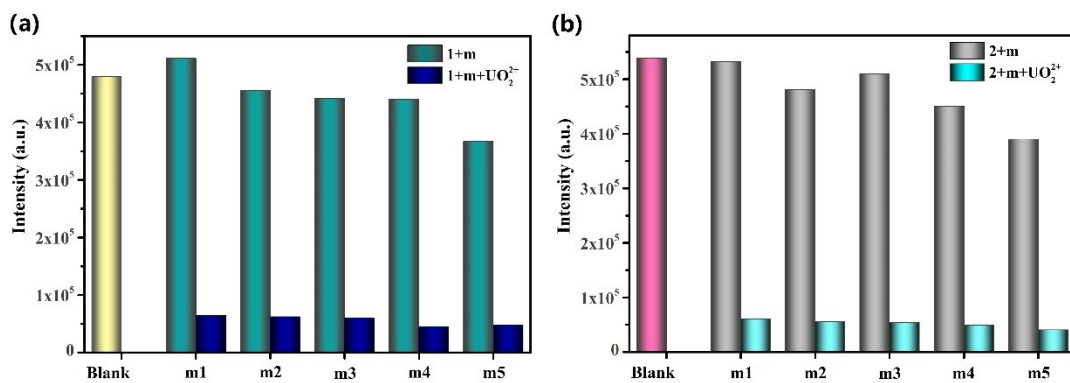

Fig. S8 Luminescence intensities of compound 1 (a) and 2 (b) with different mixed ions solution added  $\text{UO}_2^{2+}$  ion (m1:  $\text{K}^+$  /  $\text{Ca}^{2+}$  /  $\text{Mg}^{2+}$ ; m2:  $\text{Zn}^{2+}$  /  $\text{Cd}^{2+}$ ; m3:  $\text{Co}^{2+}$  /  $\text{Ni}^{2+}$ ; m4:  $\text{Ag}^+$  /  $\text{Na}^+$ ; m5:  $\text{Cr}^{3+}$  /  $\text{Cu}^{2+}$ ; 1 mM).

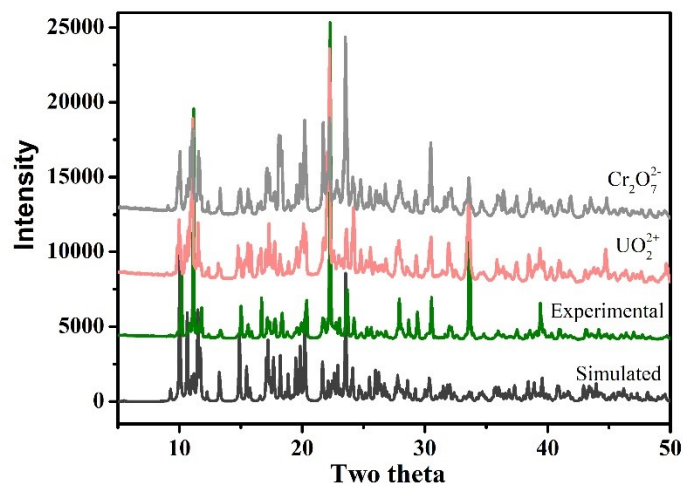

Fig. S9 PXRD pattern of compound 1 after immersing into water with different analytes.

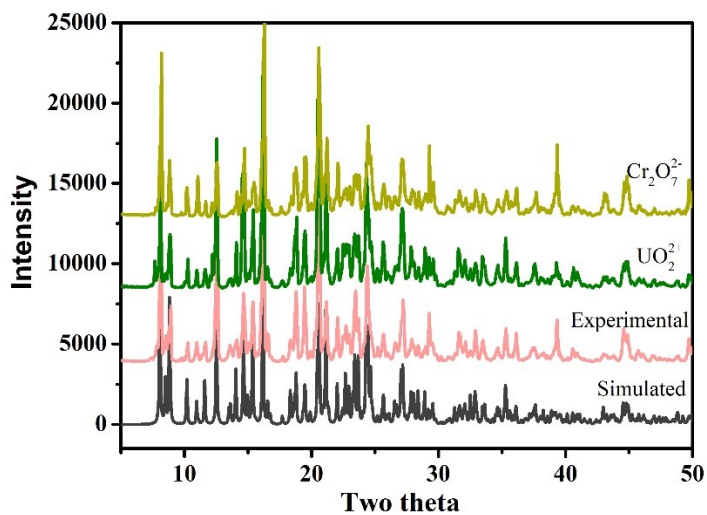

Fig. S10 PXRD pattern of compound 2 after immersing into water with different analytes.

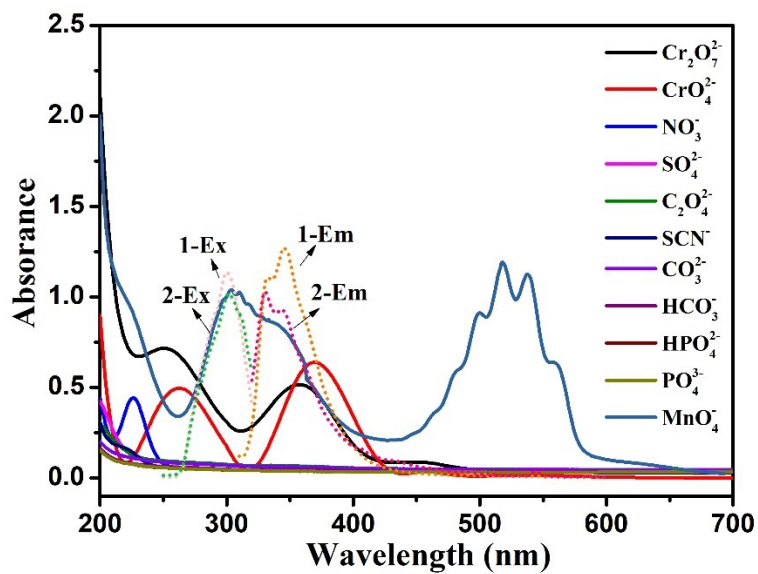

Fig. S11 UV-vis spectra of different anions in aqueous solutions, and the excitation and emission spectra of compounds 1-2.

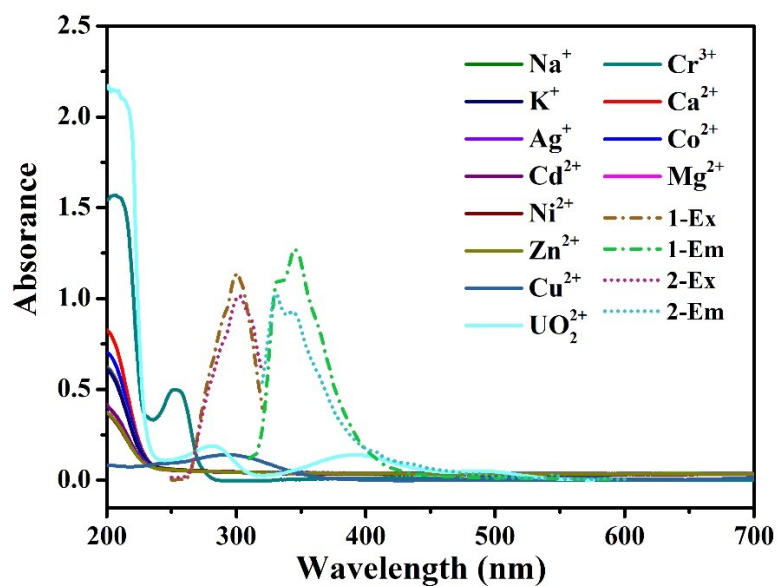

Fig. S12 UV-vis spectra of different metal ions in aqueous solutions, and the excitation and emission spectra of compounds 1-2.

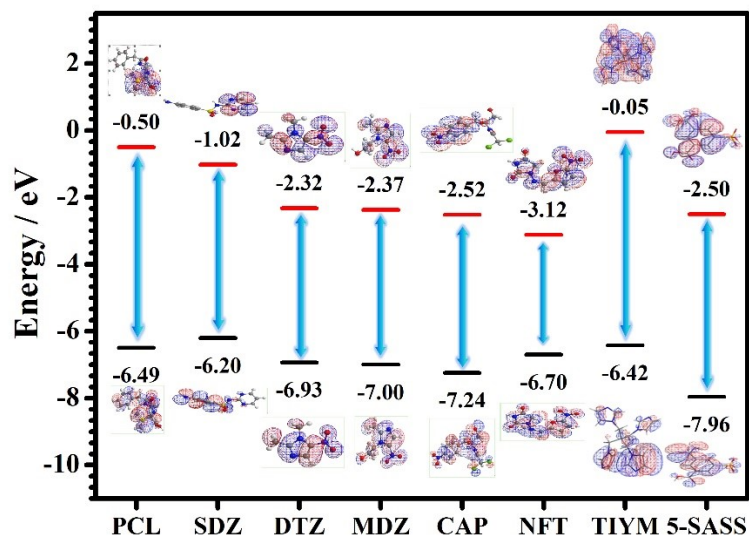

Fig. S13 The HOMO and LUMO energy levels for different antibiotics and ligands.

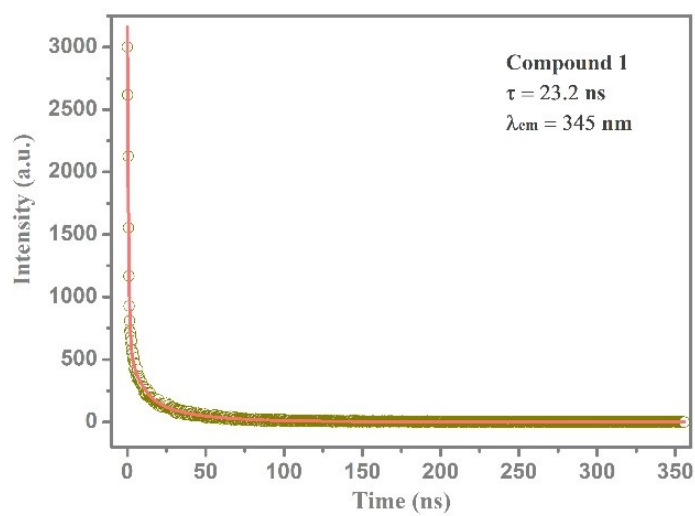

Fig. S14 Fluorescence decay for compound 1 ( $\lambda_{ex} = 300 \text{ nm}$ ).



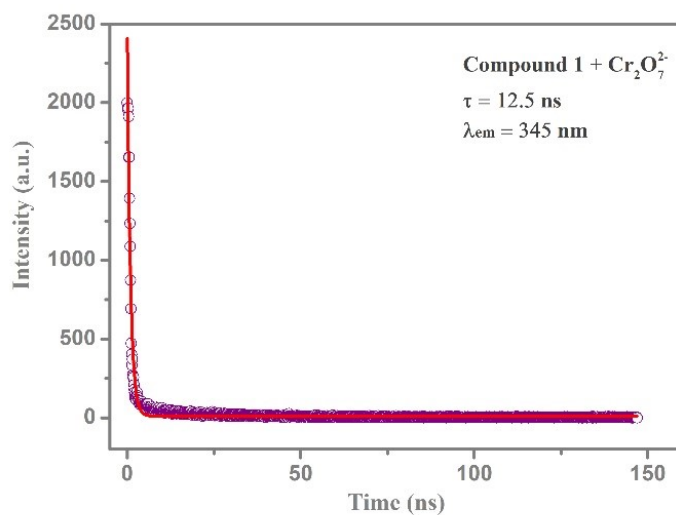

Fig. S15 Fluorescence decay for compound 1 in the presence of  $\text{Cr}_2\text{O}_7^{2-}$ .

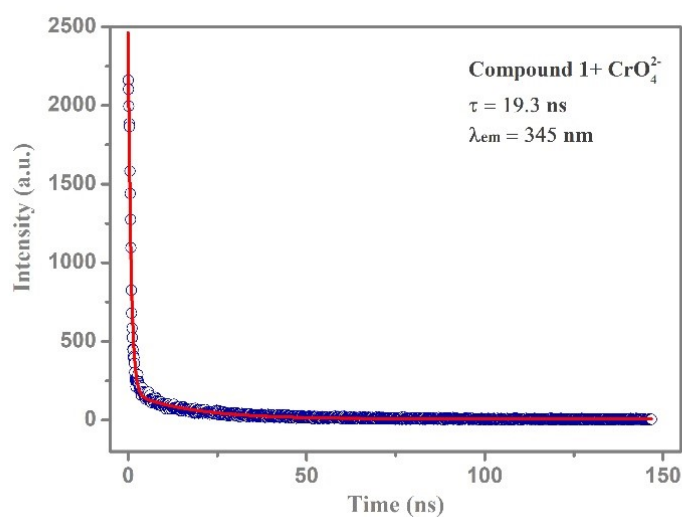

Fig. S16 Fluorescence decay for compound 1 in the presence of  $\text{CrO}_4^{2-}$  ( $\lambda_{\text{ex}} = 300 \text{ nm}$ ).

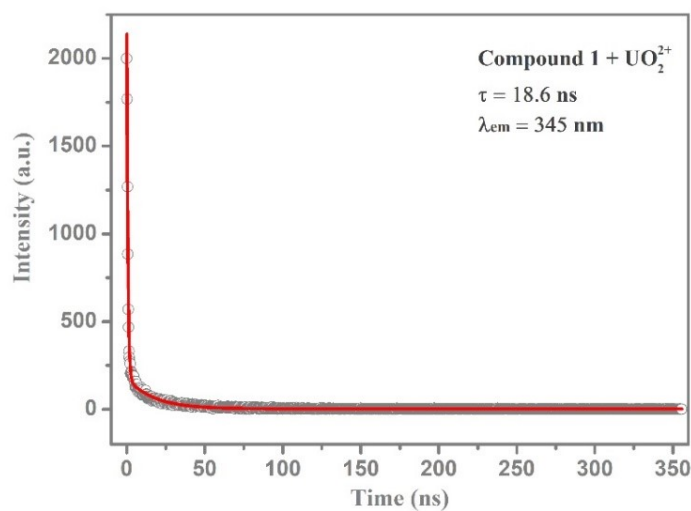

Fig. S17 Fluorescence decay for compound 1 in the presence of  $\text{UO}_2^{2+}$  ( $\lambda_{\text{ex}} = 300 \text{ nm}$ ).



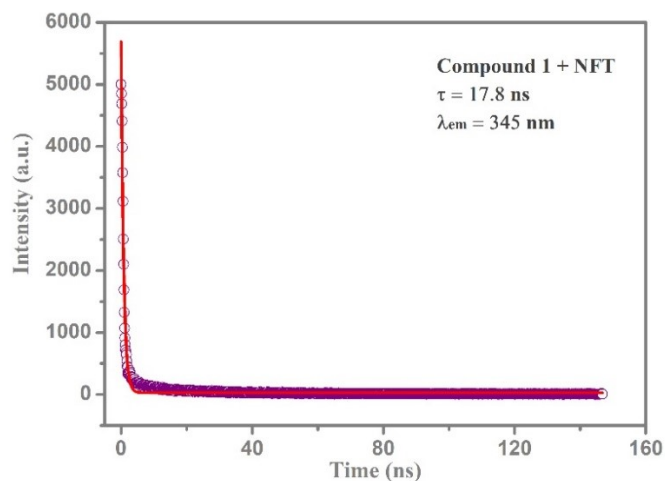

Fig. S18 Fluorescence decay for compound 1 in the presence of NFT ( $\lambda_{ex} = 300 \text{ nm}$ ).

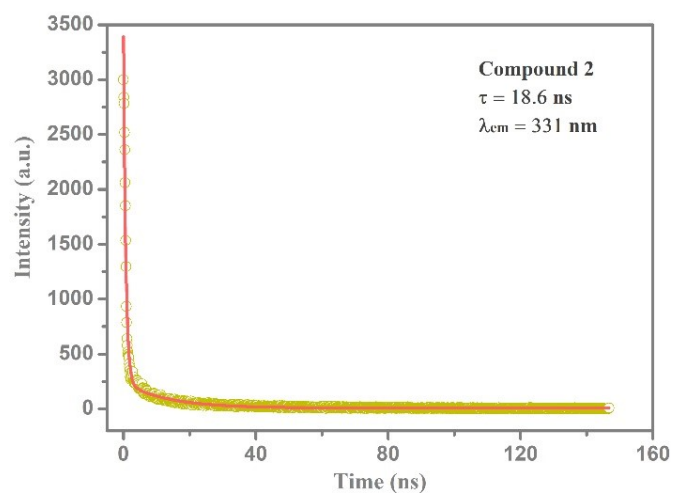

Fig. S19 Fluorescence decay for compound 2 ( $\lambda_{ex} = 300 \text{ nm}$ ).

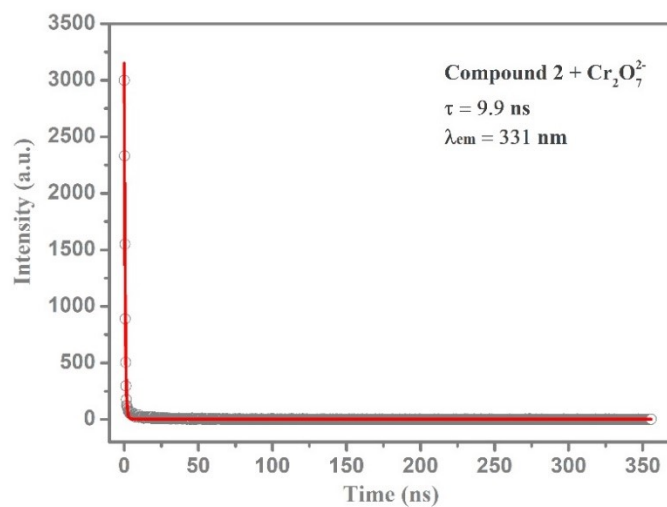

Fig.S20 Fluorescence decay for compound 2 in the presence of  $\text{Cr}_2\text{O}_7^{2-}$  ( $\lambda_{ex} = 300 \text{ nm}$ ).

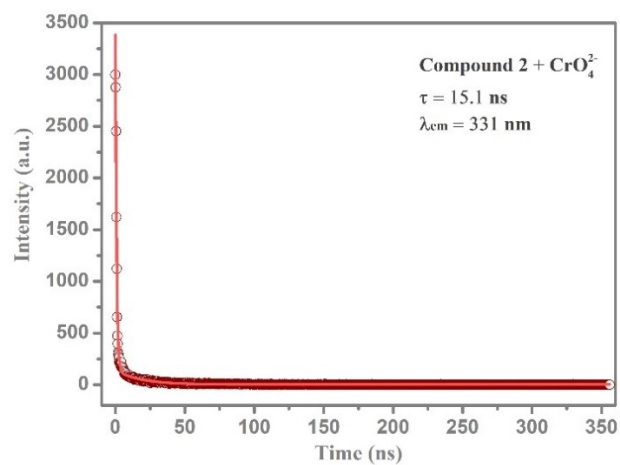

Fig. S21 Fluorescence decay for compound 2 in the presence of CrO<sub>4</sub><sup>2-</sup> ( $\lambda_{ex} = 300 \text{ nm}$ ).

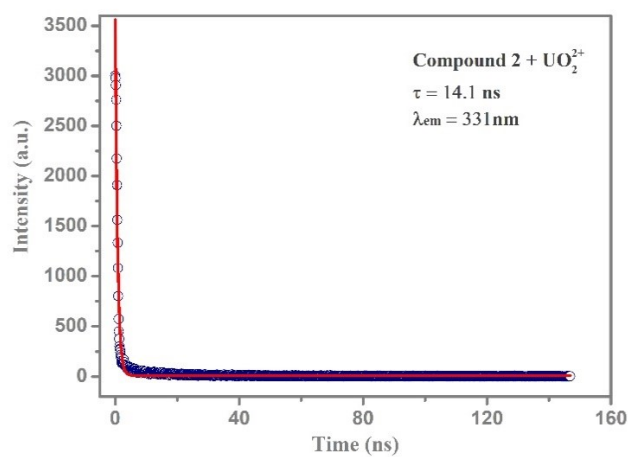

Fig. S22 Fluorescence decay for compound 2 in the presence of UO<sub>2</sub><sup>2+</sup> ( $\lambda_{ex} = 300 \text{ nm}$ ).

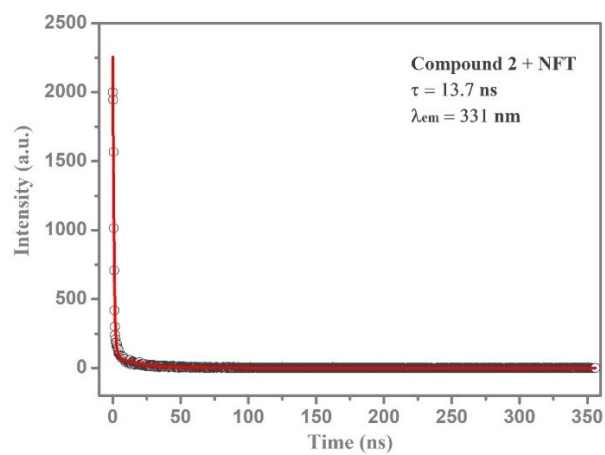

Fig.S23 Fluorescence decay for compound 2 in the presence of NFT ( $\lambda_{ex} = 300 \text{ nm}$ ).

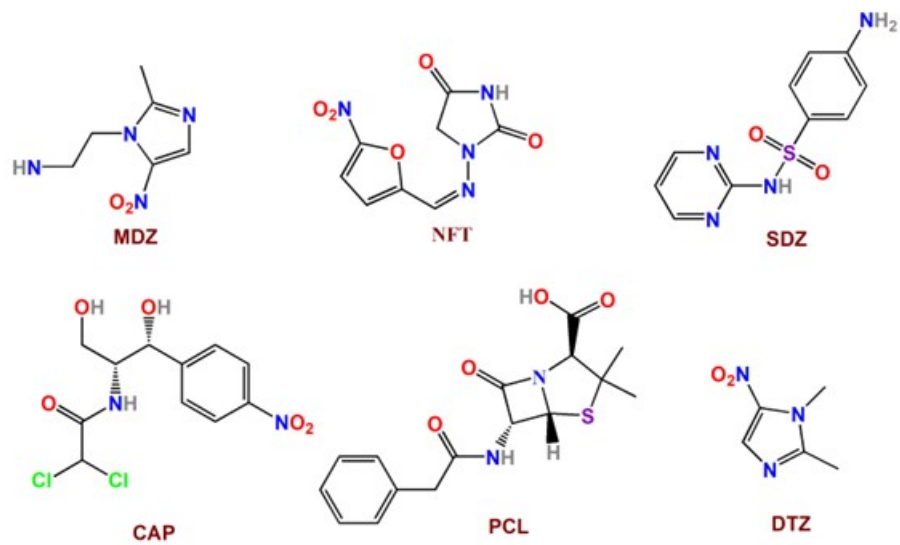

**Scheme S1.** The structures of selected antibiotics.

Reference:

1. G. M. Sheldrick, *Acta Crystallog C* 2015, **71**, 3.
2. S.-F. Tang and X. Hou, *Cryst. Growth Des.*, 2019, **19**, 45.
3. W.-Q. Tong, W.-N. Liu, L.-L. Ma, Y. Wang, J.-M. Wang, L. Hou, Y.-Y. Wang, *Dalton Trans.*, 2019, **48**, 7786.
4. X. Zhang, H. Chen, B. Li, G. Liu and X. Liu, *CrystEngComm.*, 2019, **21**, 1231.
5. T. Y. Gu, M. Dai, D. J. Young, Z. G. Ren, J. P. Lang, *Inorg. Chem.*, 2017, **56**, 4668.
6. H. R. Fu, Y. Zhao, Z. Zhou, X. G. Yang, L. F. Ma, *Dalton Trans.*, 2018, **47**, 3725.
7. T. Wiwasuku, J. Boonmak, K. Siritwong, V. Ervithayasuporn and S. Youngme, *Sensor Actuat B-Chem.*, 2019, **284**, 403.
8. Y.-J. Yang, Y.-H. Li, D. Liu and G.-H. Cui, *CrystEngComm.*, 2020, **22**, 1166.
9. J.-Y. Zou, L. Li, S.-Y. You, H.-M. Cui, Y.-W. Liu, K.-H. Chen, Y.-H. Chen, J.-Z. Cui and S.-W. Zhang, *Dyes Pigments.*, 2018, **159**, 429.
10. M. Singh, S. Senthilkumar, S. Rajput and S. Neogi, *Inorg. Chem.*, 2020, **59**, 3012.
11. R. Lv, H. Li, J. Su, X. Fu, B. Yang, W. Gu and X. Liu, *Inorg. Chem.*, 2017, **56**, 12348.
12. C. Xu, C. Bi, Z. Zhu, R. Luo, X. Zhang, D. Zhang, C. Fan, L. Cui and Y. Fan, *CrystEngComm.*, 2019, **21**, 2333.
13. X. Zhou, Y.-X. Shi, C. Cao, C.-Y. Ni, Z.-G. Ren, D. J. Young and J.-P. Lang, *Cryst. Growth Des.*, 2019, **19**, 3518.
14. C.-X. Wang, Y.-P. Xia, Z.-Q. Yao, J. Xu, Z. Chang and X.-H. Bu, *Dalton Trans.*, 2019, **48**, 387.
15. L. Li, S. Shen, J. Su, W. Ai, Y. Bai, H. Liu, *Anal. Bioanal. Chem.*, 2019, **411**, 4213.
16. J. Ye, R. F. Bogale, Y. Shi, Y. Chen, X. Liu, S. Zhang, Y. Yang, J. Zhao, and G. Ning, *Chem. Eur. J.*, 2017, **23**, 7657.
17. H. Liu, X. Wang, T. Abeywickrama, F. Jahanbazi, Z. Min, Z. Lee, J. Terry and Y. Mao, *Environ. Sci.: Nano*, 2021, **8**, 3711.
18. J.-X. Hou, J.-P. Gao, J. Liu, X. Jing, L.-J. Li, J.-L. Du, *Dyes. Pigments.*, 2019, **160**, 159.
19. Y. Wang, S.-H. Xing, F.-Y. Bai, Y.-H. Xing, and L.-X. Sun, *Inorg. Chem.*, 2018, **57**, 12850.
20. W.-M. Chen, X.-L. Meng, G.-L. Zhuang, Z. Wang, M. Kurmoo, Q.-Q. Zhao, X.-P. Wang, B. Shan, C.-H. Tung and D. Sun, *J. Mater. Chem. A.*, 2017, **5**, 13079.
21. M. Wang, G. Zeng, X. Zhang, F. Y. Bai, Y. H. Xing, Z. Shi, *J. Mol. Struct.*, 2021, **1238**, 130422.

22. W. Liu, Y. Wang, L. Song, M. A. Silver, J. Xie, L. Zhang, L. Chen, J. Diwu, Z. Chai, S. Wang, *Talanta*, 2019, **196**, 515.
23. N.-N. Chen, J. Wang, *Appl Organomet Chem.*, 2020, **34**, e5743.
24. Y. Liu, Y. Zhao, Z.-Q. Liu, X.-H. Liu, X.-D. Zhang and W.-Y. Sun, *CrystEngComm.*, 2020, **22**, 304.
25. Q.-Q. Zhu, H. He, Y. Yan, J. Yuan, D.-Q. Lu, D.-Y. Zhang, F. Sun and G. Zhu, *Inorg. Chem.*, 2019, **58**, 7746.
26. Y. Zhang, J. Yang, D. Zhao, Z. Liu, D. Li, L. Fan and T. Hu, *CrystEngComm.*, 2019, **21**, 6130.
27. Q.-Q. Zhu, Q.-S. Zhou, H.-W. Zhang, W.-W. Zhang, D.-Q. Lu, M.-T. Guo, Y. Yuan, F. Sun and H. He, *Inorg. Chem.*, 2020, **59**, 1323.
28. R. Goswami, S. C. Mandal, N. Seal, B. Pathak and S. Neogi, *J. Mater. Chem. A.*, 2019, **7**, 19471.
